# Supplementary material for: A novel AAV9-dual microRNA-vector targeting GRIK2 in the hippocampus as a treatment for mesial temporal lobe epilepsy
Source: PubMed Central journal article supplement — Mol Ther Methods Clin Dev. 2024 Sep 16;32(4):101342. doi: 10.1016/j.omtm.2024.101342 (PMC11489344; doi:10.1016/j.omtm.2024.101342), 2024-09-16
Supplement: mmc1.pdf [file mmc1.pdf]

**Supplemental information**

**A novel AAV9-dual microRNA-vector targeting**

***GRIK2* in the hippocampus as a treatment**

**for mesial temporal lobe epilepsy**

**Stéphane J. Baudouin, April R. Giles, Nick Pearson, Severine Deforges, Chenxia He, Céline Boileau, Nicolas Partouche, Andreas Borta, Justine Gautron, Morgane Wartel, Irena Bočkaj, Didier Scavarda, Fabrice Bartolomei, Guillaume Penchet, Jérôme Aupy, Jennifer Sims, Jared Smith, Andrew Mercer, Olivier Danos, Christophe Mulle, Valérie Crépel, and Richard Porter**

**Table S1.** Results from RNAseq analysis performed on Glutaneurons.

| Gene Name   | Ensembl                | Fold Change | padj     |
|-------------|------------------------|-------------|----------|
| <i>na</i>   | ENSG00000289417        | 0.584976744 | 0.042674 |
| <i>na</i>   | ENSG00000289040        | 0.587813896 | 0.028982 |
| KCNIP4-IT1  | ENSG00000280650        | 0.611832012 | 0.028654 |
| NRG1-IT1    | ENSG00000253974        | 0.638090163 | 0.039094 |
| <i>na</i>   | <i>ENSG00000249049</i> | 0.638252995 | 0.005491 |
| <i>na</i>   | <i>ENSG00000289013</i> | 0.65867056  | 0.037389 |
| ANKRD10-IT1 | ENSG00000229152        | 0.672551731 | 0.047556 |
| NDC1        | ENSG00000058804        | 0.68200984  | 0.028982 |
| <i>na</i>   | <i>ENSG00000288105</i> | 0.695764586 | 0.028982 |
| FSIP2       | ENSG00000188738        | 0.704872887 | 0.013427 |
| HFM1        | ENSG00000162669        | 0.713636375 | 0.038847 |
| USP15       | ENSG00000135655        | 0.718046855 | 0.01593  |
| GRIK2       | ENSG00000164418        | 0.718792499 | 0.001842 |
| GABRA2      | ENSG00000151834        | 0.719712814 | 0.016328 |
| DNAH14      | ENSG00000185842        | 0.721835947 | 0.039273 |
| UGGT2       | ENSG00000102595        | 0.739745091 | 0.028089 |
| ELOVL5      | ENSG00000012660        | 0.740752789 | 0.001152 |
| LINC00645   | ENSG00000258548        | 0.741343409 | 0.04085  |
| FEM1C       | ENSG00000145780        | 0.742443437 | 0.024065 |
| ANKRD36     | ENSG00000135976        | 0.743004827 | 0.022738 |
| ZBTB41      | ENSG00000177888        | 0.749210234 | 0.029039 |
| NKTR        | ENSG00000114857        | 0.750529916 | 0.027781 |
| RAP1B       | ENSG00000127314        | 0.750584278 | 0.042315 |
| CCDC82      | ENSG00000149231        | 0.755563404 | 0.02954  |
| ZDHHC21     | ENSG00000175893        | 0.756978785 | 0.037389 |
| DPY19L4     | ENSG00000156162        | 0.758862327 | 0.048406 |
| SOCS5       | ENSG00000171150        | 0.759772472 | 0.016568 |
| LRRTM4      | ENSG00000176204        | 0.760496539 | 0.032675 |
| SYT14       | ENSG00000143469        | 0.763136563 | 0.028982 |
| PUM2        | ENSG00000055917        | 0.763653523 | 0.013427 |
| ANO5        | ENSG00000171714        | 0.767461618 | 0.038477 |
| FER         | ENSG00000151422        | 0.772463258 | 0.039067 |
| FAR1        | ENSG00000197601        | 0.781913179 | 0.038477 |
| MBD5        | ENSG00000204406        | 0.796519485 | 0.048964 |
| MATR3       | ENSG00000015479        | 0.799667835 | 0.0417   |
| CALY        | ENSG00000130643        | 1.20065345  | 0.021593 |
| <i>na</i>   | <i>ENSG00000218426</i> | 1.204330118 | 0.035061 |
| <i>na</i>   | <i>ENSG00000287763</i> | 1.211661418 | 0.013006 |
| UNCX        | ENSG00000164853        | 1.215027617 | 0.010911 |
| VWA1        | ENSG00000179403        | 1.223826241 | 0.017154 |
| RPS6KA4     | ENSG00000162302        | 1.224465901 | 0.032485 |
| TPGS1       | ENSG00000141933        | 1.233523394 | 0.028654 |

|           |                 |             |          |
|-----------|-----------------|-------------|----------|
| CDKN2D    | ENSG00000129355 | 1.234297209 | 0.028089 |
| NDUFB7    | ENSG00000099795 | 1.234771055 | 0.020021 |
| FGFBP3    | ENSG00000174721 | 1.236284626 | 0.032485 |
| TMEM160   | ENSG00000130748 | 1.237051683 | 0.028654 |
| FAM171A2  | ENSG00000161682 | 1.241676003 | 0.000256 |
| ZNF580    | ENSG00000213015 | 1.241776638 | 0.00534  |
| CORO1B    | ENSG00000172725 | 1.246745544 | 0.048964 |
| ANTKMT    | ENSG00000103254 | 1.252902021 | 0.032485 |
| TMEM158   | ENSG00000249992 | 1.254685013 | 0.028982 |
| RPLP1     | ENSG00000137818 | 1.255973098 | 0.018191 |
| ZNF579    | ENSG00000218891 | 1.256683491 | 0.000434 |
| SNORA73B  | ENSG00000200087 | 1.257005807 | 0.048141 |
| ATP5F1D   | ENSG00000099624 | 1.258443646 | 0.000358 |
| MRPL55    | ENSG00000162910 | 1.288422298 | 0.039067 |
| MEX3D     | ENSG00000181588 | 1.29308729  | 1.16E-05 |
| FAM131C   | ENSG00000185519 | 1.302537751 | 0.002716 |
| SLC10A3   | ENSG00000126903 | 1.31026559  | 0.041166 |
| PRR7      | ENSG00000131188 | 1.312897567 | 0.013006 |
| DPY19L2P3 | ENSG00000291213 | 1.326112905 | 0.039067 |
| CBARP     | ENSG00000099625 | 1.326192851 | 0.000169 |
| ZNF771    | ENSG00000179965 | 1.343661485 | 0.000132 |
| TP53TG5   | ENSG00000124251 | 1.363059961 | 0.048964 |
| GLTPD2    | ENSG00000182327 | 1.366936269 | 0.028982 |
| TTC9B     | ENSG00000174521 | 1.387000408 | 0.00134  |
| CITED4    | ENSG00000179862 | 1.392920211 | 0.001347 |
| TRIM8-DT  | ENSG00000272933 | 1.407589183 | 3.26E-05 |
| CHCHD10   | ENSG00000250479 | 1.440721155 | 1.28E-05 |
| PCSK1N    | ENSG00000102109 | 1.452825586 | 0.021692 |
| C11orf96  | ENSG00000187479 | 1.462711768 | 0.005348 |
| CEBPB     | ENSG00000172216 | 1.48512436  | 2.52E-07 |
| BTBD17    | ENSG00000204347 | 1.511385821 | 0.025646 |
| HES4      | ENSG00000188290 | 1.515355793 | 1.81E-05 |
| C1QTNF4   | ENSG00000172247 | 1.571064154 | 3.77E-09 |
| INAFM1    | ENSG00000257704 | 1.705244732 | 1.19E-07 |
| C4orf48   | ENSG00000243449 | 2.0300481   | 0.010838 |

**Table S2.** Result of *in silico* analysis

**Table S3.** Mean *GRIK2* decrease in human organotypic slices treated by AAV9aGRIK2 vs non transduced slice, per patient.

| Type          | Gender | Age (in years) at resection | (n responding slices / n tested slices) |
|---------------|--------|-----------------------------|-----------------------------------------|
| Not available | Male   | 40                          | 50% (4/5)                               |
| IIa           | Male   | 44                          | 84%                                     |
| IIIb          | Female | 46                          | 25%                                     |
| glioblastoma  | Female | 52                          | 23%                                     |
| Ia            | Female | 51                          | 25%                                     |
| IIa           | Male   | 49                          | 25%                                     |
| IIa           | Male   | 40                          | 36%                                     |
| Ia            | Female | 11                          | 41%                                     |
| Ia            | Male   | 49                          | 35%                                     |

**Table S4.** Pathological features of patients with refractory mTLE who donated their resection for electrophysiology studies

| Pathology                                                                                                                                                         | Gender | Age (in years) at resection |
|-------------------------------------------------------------------------------------------------------------------------------------------------------------------|--------|-----------------------------|
| Cryptogenic refractory epilepsy, epileptogenic region located on the right temporal lobe and associated with the anterior insula                                  | Female | 41                          |
| Refractory temporal epilepsy located on the left lobe with hippocampal sclerosis                                                                                  | Female | 44                          |
| Refractory temporal epilepsy located on the left lobe with possible focal cortical dysplasia                                                                      | Female | 52                          |
| Refractory temporal epilepsy located on the anterior right lobe with minimal hippocampal sclerosis                                                                | Male   | 41                          |
| Left anterior temporal focal epilepsy with hypertrophic appearance of the left amygdala nucleus, Loss of hippocampal digitations without other signs of sclerosis | Male   | 36                          |

**Table S5.** Summary of incidence and average severity of histopathology findings in NHP GLP toxicity study.

|                               | incidence | average severity | incidence | average severity | incidence | average severity |
|-------------------------------|-----------|------------------|-----------|------------------|-----------|------------------|
| Dose (vg/hippocampus)         | 6.00E+10  |                  | 2.40E+11  |                  | 1.20E+12  |                  |
| microgliosis                  | 2/6       | 0.67             | 5/6       | 1.33             | 6/6       | 2                |
| astrocytosis                  | 2/6       | 0.67             | 5/6       | 1.67             | 6/6       | 1.83             |
| gliosis                       | 3/6       | 0.83             | 3/6       | 1                | 6/6       | 2                |
| infiltrate, mononuclear cells | 2/6       | 0.33             | 4/6       | 1                | 6/6       | 1.67             |

*tissue severity grade: 1 = minimal, 2 = mild, 3 = moderate, 4 = marked, 5 = severe.*

**Table S6:** Reporting of unscheduled death across studies investigating the effect of AAV-*aGRIK2* on electrographic seizures.

| Group                           | Dose<br>(gc/<br>Hippocampus) | Number of animals |           |                       |                                |
|---------------------------------|------------------------------|-------------------|-----------|-----------------------|--------------------------------|
|                                 |                              | Enrolled          | Surviving | Unscheduled death     |                                |
|                                 |                              |                   |           | Post-AAV<br>injection | Post electrode<br>implantation |
| non-injected                    |                              | 7                 | 7         | n.a.                  | 0                              |
| diluent                         |                              | 24                | 13        | n.a.                  | 11                             |
| AAV9 control                    | 5.00E+09                     | 22                | 16        | 2                     | 6                              |
| AAV- <i>aGRIK2</i>              | 5.00E+07                     | 12                | 8         | 0                     | 4                              |
| AAV- <i>aGRIK2</i>              | 5.00E+08                     | 36                | 22        | 2                     | 12                             |
| AAV- <i>aGRIK2</i>              | 5.00E+09                     | 46                | 35        | 3                     | 8                              |
| AAV- <i>aGRIK2</i>              | 5.00E+10                     | 14                | 9         | 0                     | 5                              |
| % survival of AAV injected mice |                              |                   | 69.23077  | 94.61538              | 73.07692                       |
| Total % survival                |                              |                   | 68.32298  | 95.65217              | 71.42857                       |



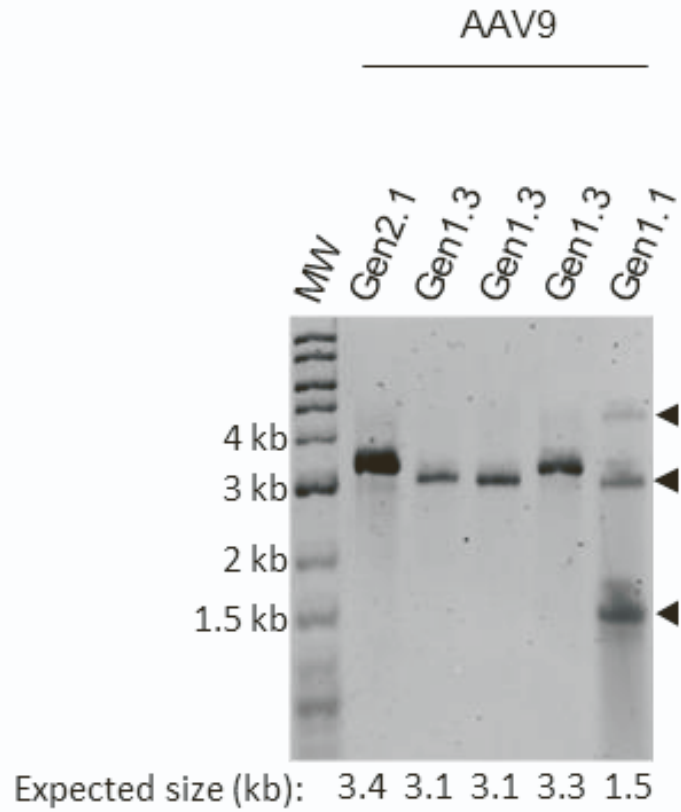

**Fig. S1.** Incorporation of a DNA stuffer to increase expected genome length limits genome packaging to a single copy of the intended genome length. Alkaline gel analysis demonstrating the length of packaged Gen1.1, Gen1.3, and Gen2.1 vector genomes.

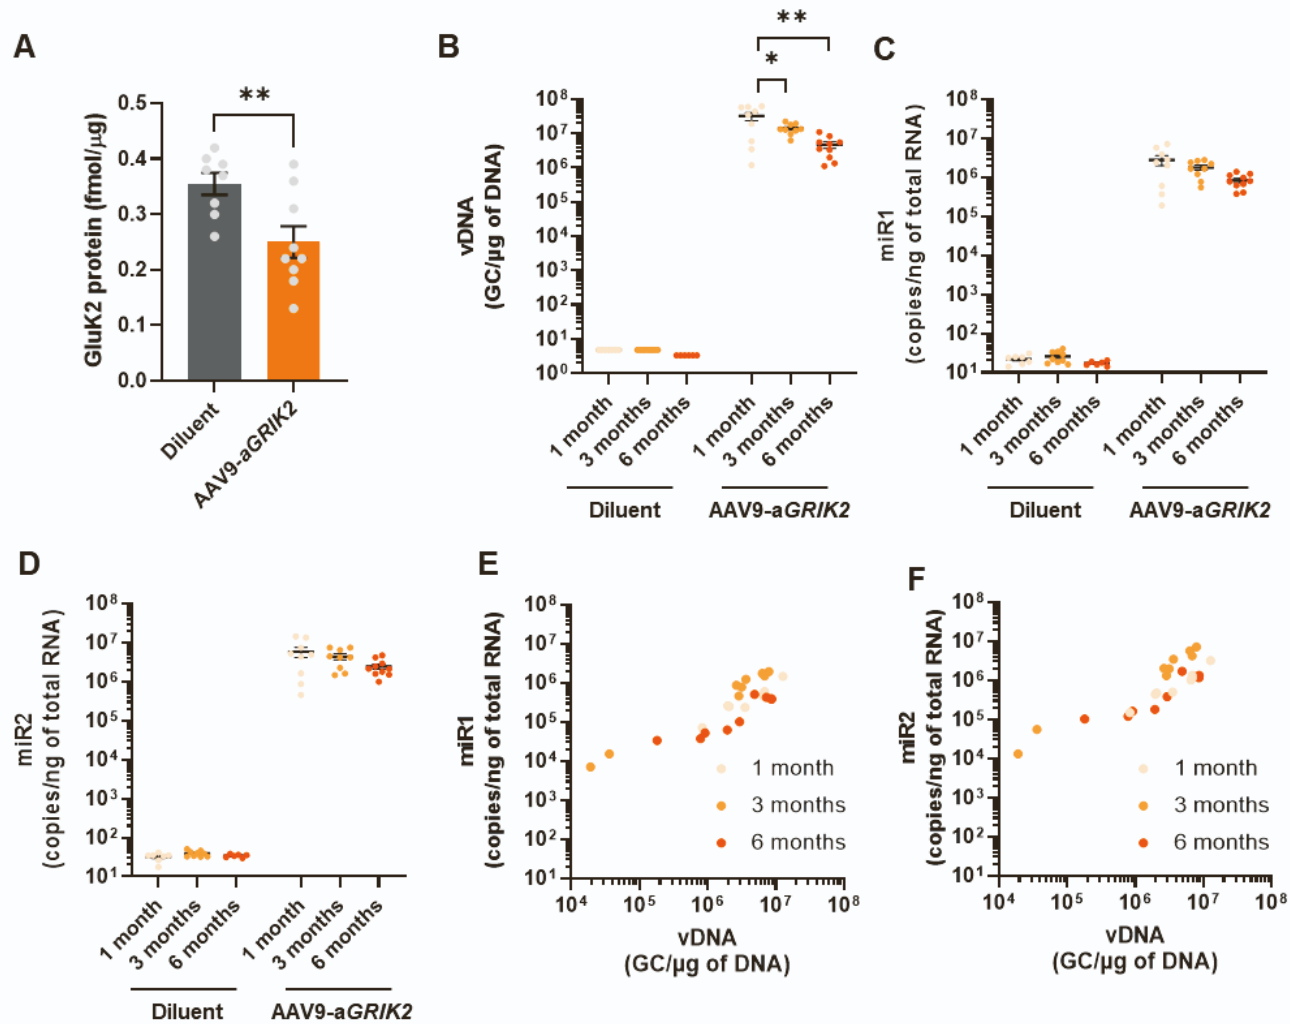

**Fig. S2.** (A) GluK2 protein expression at 6 months after administration of AAV9-aGRIK2 or diluent in non-epileptic mice. (B) Quantification of vDNA, (C) miR1 and (D) miR2 in the hippocampus of epileptic mice administered with AAV9-aGRIK2 or the diluent. (E) Correlation between vector copies and miR1 or (F) miR2 expression in pilocarpine treated mice up to six months after administration of AAV9-aGRIK2. (A) \*\*  $P < 0.01$ , unpaired t-test. (B to F) \*  $P < 0.05$  and \*\*  $P < 0.01$ , Kruskal Wallis test followed by Dunn's multiple comparison. Results are presented as mean  $\pm$  SEM.

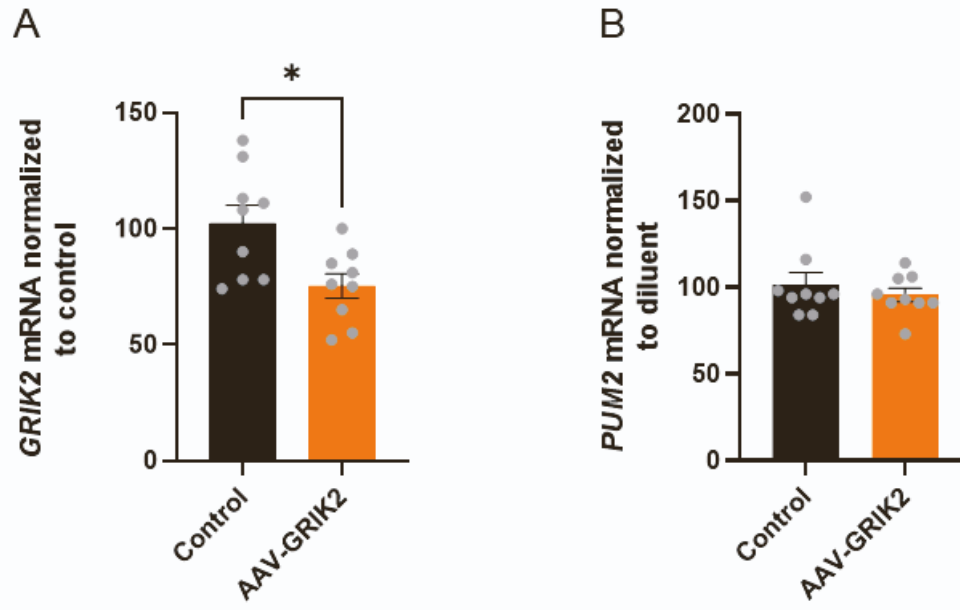

**Fig. S3.** AAV9-a*GRIK2* administration in epileptic mice reduces hippocampal expression of *GRIK2* mRNA but not of *PUM2* mRNA expression. (A) *GRIK2* mRNA expression levels. (B) *PUM2* mRNA expression levels. Results are presented as mean  $\pm$  SEM. \*  $P < 0.05$ , unpaired t-test.

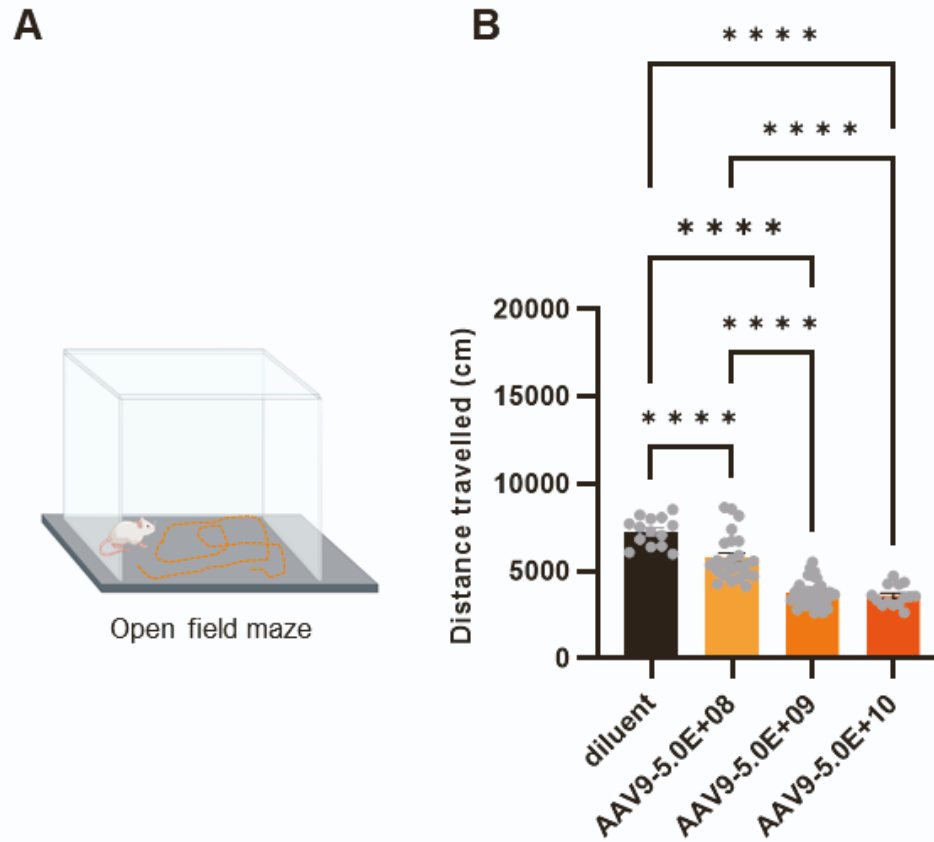

**Fig. S4.** AAV9-*aGRIK2* treatment reduces the pathological hyperlocomotion in epileptic mice. (A) Schematic representation of the open field maze. (B) Distance traveled in the open-field 3 weeks after administration of AAV9-*aGRIK2* or diluent. Results are presented as mean  $\pm$  SEM. \*\*\*\*  $P < 0.0001$ , one-way ANOVA followed by Tukey's multiple comparisons test.
